# Supplementary material for: Gram-Scale Synthesis of Blue-Emitting CH3NH3PbBr3 Quantum Dots Through Phase Transfer Strategy
Source: Front Chem. 2018 Sep 26;6:444. doi: 10.3389/fchem.2018.00444 (PMC6169035; doi:10.3389/fchem.2018.00444)
Supplement: Supplementary file 1 [file Table_1.docx]

**Supporting Information**

Gram-Scale Synthesis of Blue-Emitting CH3NH3PbBr3 Quantum Dots through Phase Transfer Strategy

*Feng Zhang,*[*†*](http://pubs.acs.org/doi/abs/10.1021/jp072540p?prevSearch=%2528Gregory%2BScholes%2529%2BNOT%2B%255Batype%253A%2Bad%255D%2BNOT%2B%255Batype%253A%2Bacs-toc%255D&searchHistoryKey=#jp072540pAF2) *Changtao Xiao,*[*†*](http://pubs.acs.org/doi/abs/10.1021/jp072540p?prevSearch=%2528Gregory%2BScholes%2529%2BNOT%2B%255Batype%253A%2Bad%255D%2BNOT%2B%255Batype%253A%2Bacs-toc%255D&searchHistoryKey=#jp072540pAF2) *Yunfei Li,*[*‡*](http://pubs.acs.org/doi/abs/10.1021/jp072540p?prevSearch=%2528Gregory%2BScholes%2529%2BNOT%2B%255Batype%253A%2Bad%255D%2BNOT%2B%255Batype%253A%2Bacs-toc%255D&searchHistoryKey=#jp072540pAF3)*Xin Zhang,*[*†*](http://pubs.acs.org/doi/abs/10.1021/jp072540p?prevSearch=%2528Gregory%2BScholes%2529%2BNOT%2B%255Batype%253A%2Bad%255D%2BNOT%2B%255Batype%253A%2Bacs-toc%255D&searchHistoryKey=#jp072540pAF2) *Jialun Tang,*[*†*](http://pubs.acs.org/doi/abs/10.1021/jp072540p?prevSearch=%2528Gregory%2BScholes%2529%2BNOT%2B%255Batype%253A%2Bad%255D%2BNOT%2B%255Batype%253A%2Bacs-toc%255D&searchHistoryKey=#jp072540pAF2)*Shuai Chang,*[*†*](http://pubs.acs.org/doi/abs/10.1021/jp072540p?prevSearch=%2528Gregory%2BScholes%2529%2BNOT%2B%255Batype%253A%2Bad%255D%2BNOT%2B%255Batype%253A%2Bacs-toc%255D&searchHistoryKey=#jp072540pAF2)** Qibing Pei,*[*‡*](http://pubs.acs.org/doi/abs/10.1021/jp072540p?prevSearch=%2528Gregory%2BScholes%2529%2BNOT%2B%255Batype%253A%2Bad%255D%2BNOT%2B%255Batype%253A%2Bacs-toc%255D&searchHistoryKey=#jp072540pAF3)*and Haizheng Zhong*[*†*](http://pubs.acs.org/doi/abs/10.1021/jp072540p?prevSearch=%2528Gregory%2BScholes%2529%2BNOT%2B%255Batype%253A%2Bad%255D%2BNOT%2B%255Batype%253A%2Bacs-toc%255D&searchHistoryKey=#jp072540pAF2)

[†](http://pubs.acs.org/doi/abs/10.1021/jp072540p?prevSearch=%2528Gregory%2BScholes%2529%2BNOT%2B%255Batype%253A%2Bad%255D%2BNOT%2B%255Batype%253A%2Bacs-toc%255D&searchHistoryKey=#jp072540pAF2) Beijing Key Laboratory of Nanophotonics and Ultrafine Optoelectronic Systems, School of Materials Science & Engineering, Beijing Institute of Technology,5 Zhongguancun South Street, Haidian District, Beijing, 100081, China

‡ Department of Materials Sciences and Engineering, California NanoSystems Institute, Henry Samuli School of Engineering and Applied Science, University of California, Los Angeles, California, United States

* E-mail: [schang@bit.edu.cn](mailto:schang@bit.edu.cn)


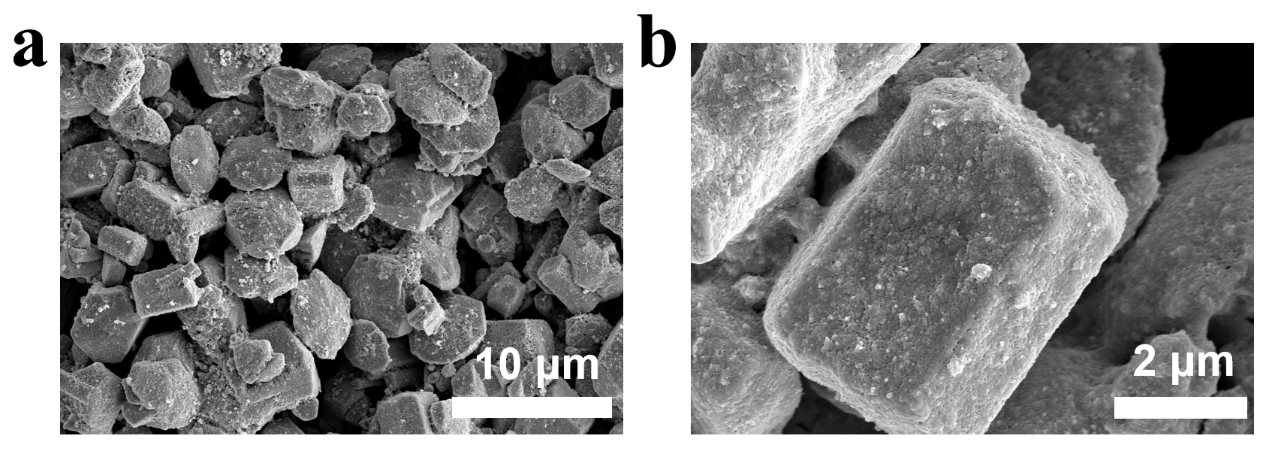


Figure S1. SEM images of precipitates obtained in conventional emulsion synthesis. (a) Scale bar of 10 μm; (b) Scale bar of 2 μm.


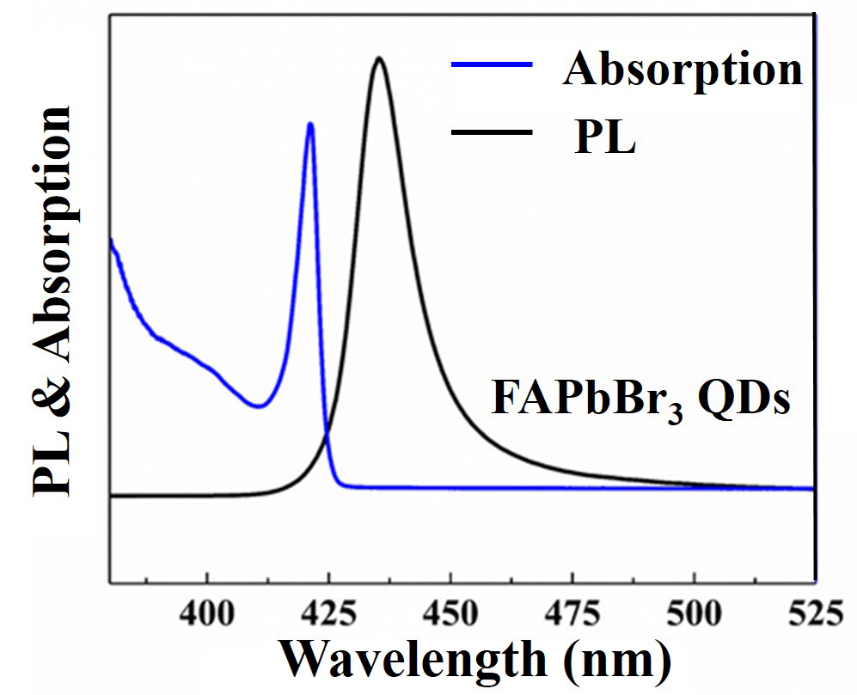


Figure S2. Absorption and PL spectra of the as-fabricated FAPbBr3 QDs.


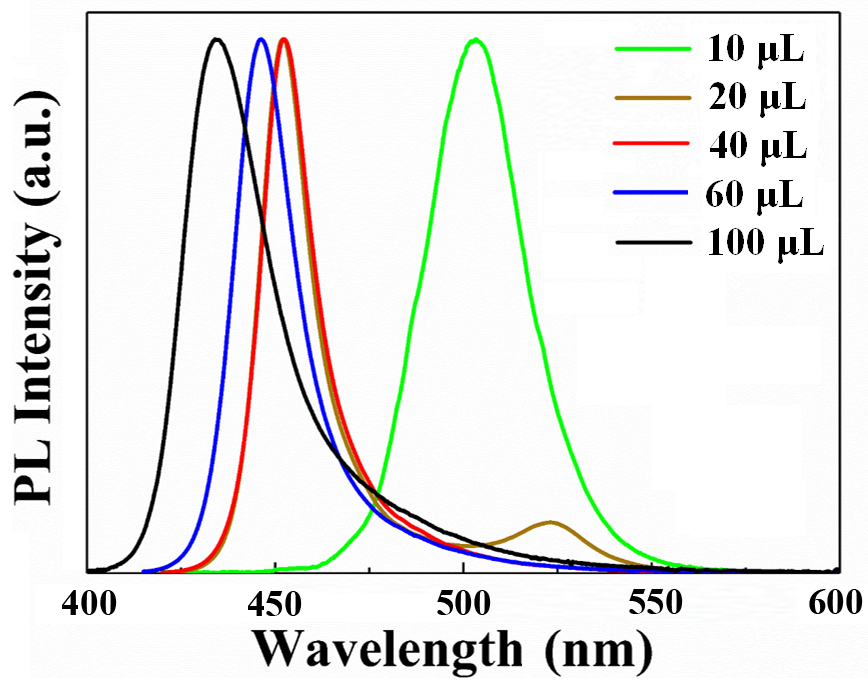


Figure S3. Wavelength tunable CH3NH3PbBr3 QDs by varying the amount of ligands.


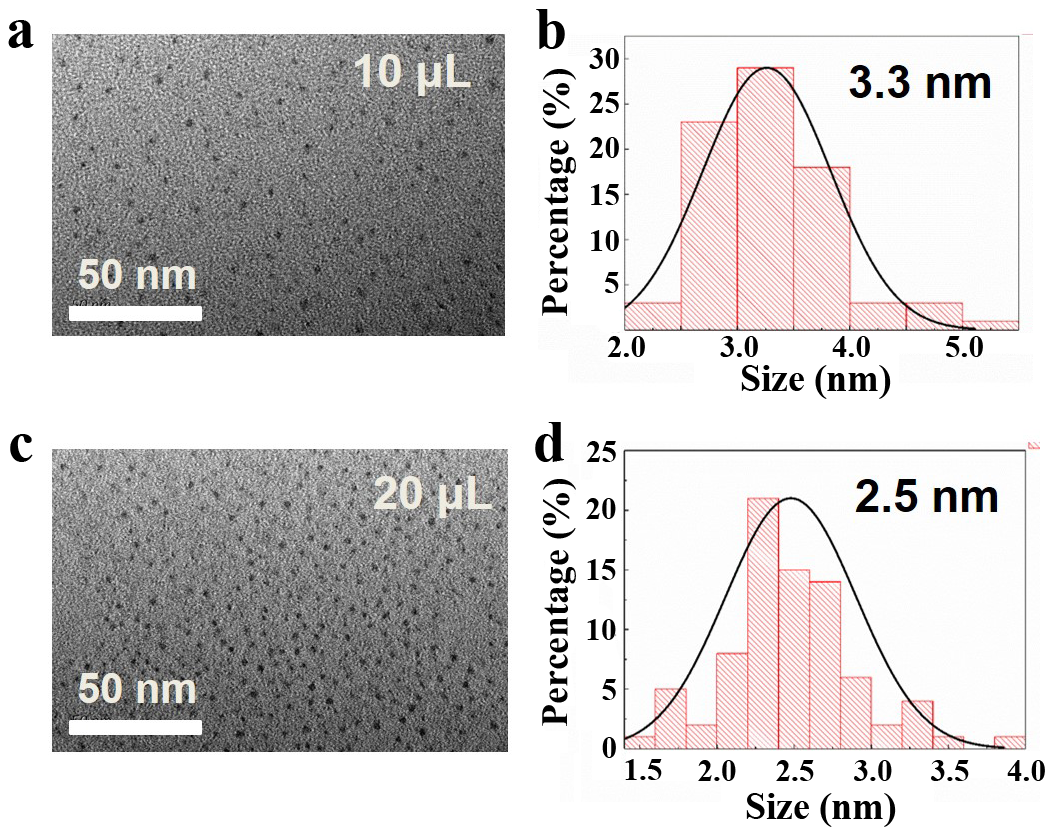


Figure S4. TEM images of CH3NH3PbBr3 QDs fabricated using varied amount of ligands and the corresponding statistical analysis of QD sizes. (a, b) 10 μL; (c, d) 20 μL.
